# Supplementary material for: Local Gene Regulation Details a Recognition Code within the LacI Transcriptional Factor Family
Source: PubMed Central journal article supplement (PMC2978694; doi:10.1371/journal.pcbi.1000989), 2010-11-11
Supplement: pcbi.1000989.s008.pdf [file pcbi.1000989.s008.pdf]

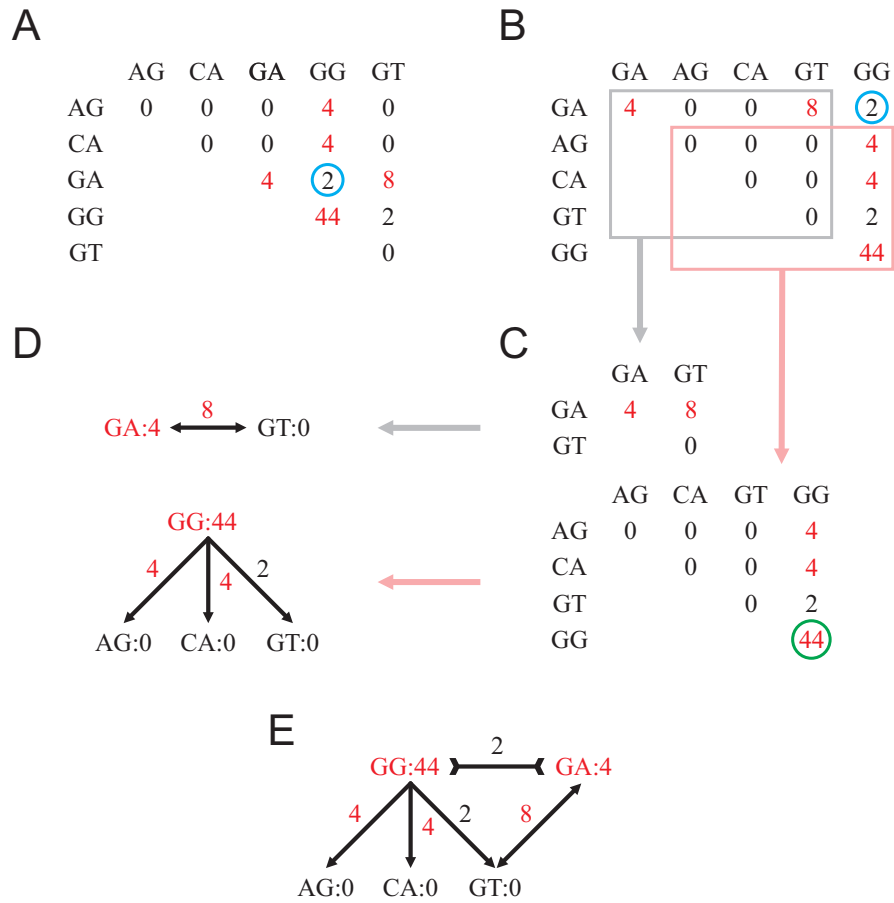

Figure S7: Protocol to distinguish among the different types of degenerate recognitions in the set of binding sites associated to a same recognition sequence ( $K_{15}S_{16}$  in this example). See Text S1 for details.
