# Supplementary material for: Local Gene Regulation Details a Recognition Code within the LacI Transcriptional Factor Family
Source: PubMed Central journal article supplement (PMC2978694; doi:10.1371/journal.pcbi.1000989), 2010-11-11
Supplement: pcbi.1000989.s010.pdf [file pcbi.1000989.s010.pdf]

| Natural BS O1 for <i>E. coli</i> LacI                                              |                        |                 |     |                                                                       |       |                          |
|------------------------------------------------------------------------------------|------------------------|-----------------|-----|-----------------------------------------------------------------------|-------|--------------------------|
| AAT TGTGAGC-GGATAACA ATT                                                           |                        |                 |     |                                                                       |       |                          |
| Synthetic BS: O1 with deletion in NT-2 <sub>R</sub> (reference [51], main text)    |                        |                 |     |                                                                       |       |                          |
| AAT TGTGAGC-GATAACA ATT                                                            |                        |                 |     |                                                                       |       |                          |
| Palindromic synthetic BSs (reference [19], main text)                              |                        |                 |     |                                                                       |       |                          |
| BS                                                                                 | BS sequence            |                 |     | Binding LacI mutant                                                   |       |                          |
| SymL                                                                               | AAT TGTGAGC-GCTACA ATT |                 |     | Y <sub>15</sub> Q <sub>16</sub> (wt), H <sub>15</sub> Q <sub>16</sub> |       |                          |
| SymL'                                                                              | AAT TGTTAGC-GCTACA ATT |                 |     | H <sub>15</sub> Q <sub>16</sub>                                       |       |                          |
| Natural BSs for H <sub>15</sub> Q <sub>16</sub> (this work, all in actinobacteria) |                        |                 |     |                                                                       |       |                          |
| TF VIMSS-ID                                                                        | BS sequence            |                 |     | position                                                              | AU/NR | species                  |
| 1810447                                                                            | AgT                    | TGTGAGC-GCTACA  | ATT | -86                                                                   | NR    | AAur                     |
| 3749792                                                                            | tga                    | TGTGAcC-GtTCACA | tcg | -64                                                                   | NR    | CMM                      |
| 2169839                                                                            | gga                    | TGTGAGC-GCTACA  | cTc | -77                                                                   | NR    | Noca                     |
| 2169839                                                                            | tca                    | TGTGAaC-GCTACA  | ATT | -105                                                                  | NR    | Noca                     |
| 2004131                                                                            | ggT                    | TGTTAGC-GCTAAcT | gaa | -65                                                                   | AU    | BAD                      |
| 2004131                                                                            | AAT                    | aGTGAGC-GtTAACA | gTg | -59                                                                   | NR    | BAD                      |
| 2004131                                                                            | AAc                    | aGTGAGC-GCTACA  | tTc | -64                                                                   | NR    | BAD                      |
| 2268667                                                                            | tAg                    | TGTGAGC-GCTAAcG | caa | -41                                                                   | AU    | Blon                     |
| 2268667                                                                            | AAT                    | TGTGAGC-GCTACA  | ccc | -70                                                                   | NR    | Blon                     |
| Natural SymL-like BSs for Y <sub>15</sub> Q <sub>16</sub> (this work, PF scan)     |                        |                 |     |                                                                       |       |                          |
| 3571242                                                                            | tAg                    | TGTGAcC-GaTCACA | gca | -168                                                                  | AU    | Rcas (cloroflexi)        |
| 3654531                                                                            | tgc                    | TGTGAaC-GtTCACg | tga | -39                                                                   | NR    | SACE (actino.)           |
| 3760850                                                                            | gAT                    | TGTGAGC-GtTCACA | tgg | -124                                                                  | AU    | sce ( $\delta$ -proteo.) |

Table S2: Natural and synthetic binding sites (BSs) for Y<sub>15</sub>Q<sub>16</sub> and H<sub>15</sub>Q<sub>16</sub>. A dot distinguishes the half sites. Colors identify different palindromic or mixed combinations in the quartet (NT-5<sub>L</sub>, NT-4<sub>L</sub>; NT-4<sub>R</sub>, NT-5<sub>R</sub>). Flanking nucleotides are separated by a space to help visualization of the highly conserved central region of the BSs. Positions are relative to the start codon of the first downstream regulated gen. The intergenic regions in which the BSs were found (see Figure 2.A, main text) are indicated by AU (autoregulation) or NR (downstream neighbor regulation). Natural BSs for the recognition sequence H<sub>15</sub>Q<sub>16</sub> are very similar to either the perfect palindromic sequences of SymL and SymL', or their mixture. For Y<sub>15</sub>Q<sub>16</sub> we also found several BSs in the first raw phylogenetic footprinting (PF) scan that resemble the synthetic SymL construction. Species abbrev.: AAur, *Arthrobacter aurescens* TC1; BAD, *Bifidobacterium adolescentis* ATCC 15703; Noca, *Nocardioides* sp. JS614; Blon, *Bifidobacterium longum* DJO10A; CMM, *Clavibacter michiganensis* subsp. *michiganensis* NCPPB 382; Rcas, *Roseiflexus castenholzii* DSM 13941; SACE, *Saccharopolyspora erythraea* NRRL 2338; sce, *Sorangium cellulosum* 'So ce 56'.
